# Supplementary material for: The survival of B cells is compromised in kidney disease
Source: PubMed Central journal article supplement — Nat Commun. 2024 Dec 30;15:10842. doi: 10.1038/s41467-024-55187-w (PMC11685736; doi:10.1038/s41467-024-55187-w), 2024-12-30
Supplement: 41467_2024_55187_MOESM1_ESM.pdf [file 41467_2024_55187_MOESM1_ESM.pdf]

## Supplementary Information

### The survival of B cells is compromised in kidney disease

Doureradjou Peroumal<sup>1,2,†</sup>, Chetan V. Jawale<sup>1,2,†</sup>, Wonseok Choi<sup>1,2,7</sup>, Hossein Rahimi<sup>1,2,7</sup>, Danielle Antos<sup>2,3</sup>, De-dong Li<sup>1,2</sup>, Shuxia Wang<sup>1</sup>, Godhev K. Manakkat Vijay<sup>2,4</sup>, Isha Mehta<sup>2,4</sup>, Raymond West<sup>5</sup>, Muthusamy Thangaraju<sup>6</sup>, Thomas D. Nolin<sup>5</sup>, Jishnu Das<sup>2,4</sup>, John F. Alcorn<sup>2,3</sup> and Partha S. Biswas<sup>1,2,7\*</sup>

<sup>1</sup> Division of Rheumatology and Clinical Immunology, Department of Medicine, University of Pittsburgh, Pittsburgh, PA 15261, USA

<sup>2</sup> Department of Immunology, University of Pittsburgh, Pittsburgh, PA 15261, USA

<sup>3</sup> Department of Pediatrics, University of Pittsburgh, Pittsburgh, PA 15261, USA

<sup>4</sup> Center for Systems Immunology, Department of Immunology and Computational & Systems Biology, University of Pittsburgh, Pittsburgh, PA 15261, USA

<sup>5</sup> Department of Pharmacy and Therapeutics, University of Pittsburgh, Pittsburgh, PA 15261, USA

<sup>6</sup> Department of Biochemistry and Molecular Biology, Medical College of Georgia, Augusta University, Augusta, GA 30912, USA

<sup>7</sup> Department of Microbiology and Immunology, Renaissance School of Medicine, Stony Brook University, Stony Brook, NY 11794, USA

\* Corresponding author:

Dr. Partha S. Biswas, DVM, PhD  
Professor of Microbiology and Immunology  
Dept. of Microbiology and Immunology  
Renaissance School of Medicine  
234 Life Sciences Bldg.  
Stony Brook University  
Stony Brook, NY 11794  
Phone: 631-632-9743  
Email: partha.biswas@stonybrook.edu  
ORCID ID: 0000-0002-4570-7443

† These authors contributed equally.

Supplementary Figures and Figure Legends:

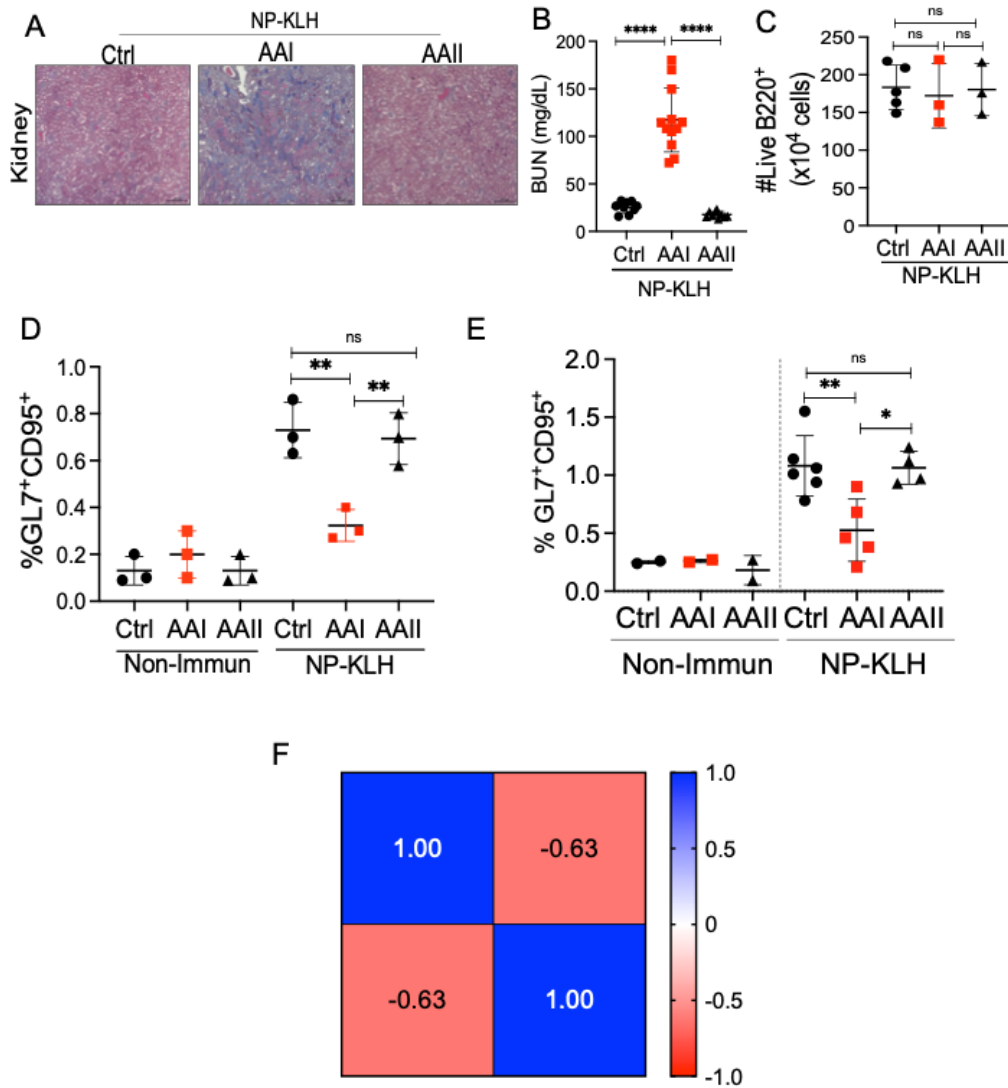

|   | Correlation Variable | Spearman r   | Confidence interval (r2) = 95% | P value  |
|---|----------------------|--------------|--------------------------------|----------|
| 1 | BUN (mg/dL)          | -0.630689207 | -0.8391 to -0.2608             | 0.002175 |
| 2 | B220+GL7+CD95+ (%)   |              |                                |          |

**Fig S1: B cell response in NP-KLH immunized mice with kidney disease.** WT mice were i.p. injected with a single dose of AAI, AAI2 (7.5 mg/kg b.wt) or PBS (Ctrl). Mice were either immunized with NP-KLH in alum or left non-immunized (non-immun) 4 days post-AAI injection.

At day 12 post-immunization, (A) Renal fibrosis (n=6) was evaluated following staining with Masson's trichrome stain of kidney sections. Image representative of 2 independent experiments. Scale bar = 50  $\mu$ m. (B) Serum BUN was assessed by enzymatic assay [Ctrl (9), AAI (12), AAI (9)], (C) Total B cells (liveB220<sup>+</sup>) in the bonemarrow were quantified by flow cytometry [Ctrl (5), AAI (3), AAI (3)]. (D) Renal lymph nodes were evaluated for total GC B cells. (E) At 21 days post-immunization, spleens were assessed for total GC B cells (liveB220<sup>+</sup>GL7<sup>+</sup>CD95<sup>+</sup>) by flow cytometry [Non-immun: Ctrl (2), AAI (2), AAI (2); NP-KLH: Ctrl (6), AAI (5), AAI (4)]. (F) Nonparametric Spearman r correlation analysis for BUN (mg/dL) and percentage of GC B cells in NP-KLH immunized mice (n=21). Each dot represents individual mice and data are pooled from at least 2-3 independent experiments (B-E). Data expressed as Mean  $\pm$  SD. Statistical analyses by One-way ANOVA (B-E) and nonparametric Spearman r correlation analysis (F). (B) \*\*\*\* P<0.0001. (D) Ctrl vs. AAI \*\* P=0.0043, AAI vs. AAI \*\* P= 0.0065. (E) Ctrl vs. AAI \*\* P=0.0064, AAI vs. AAI \* P=0.0147. ns: statistically not significant. Source data are provided as a Source Data file.

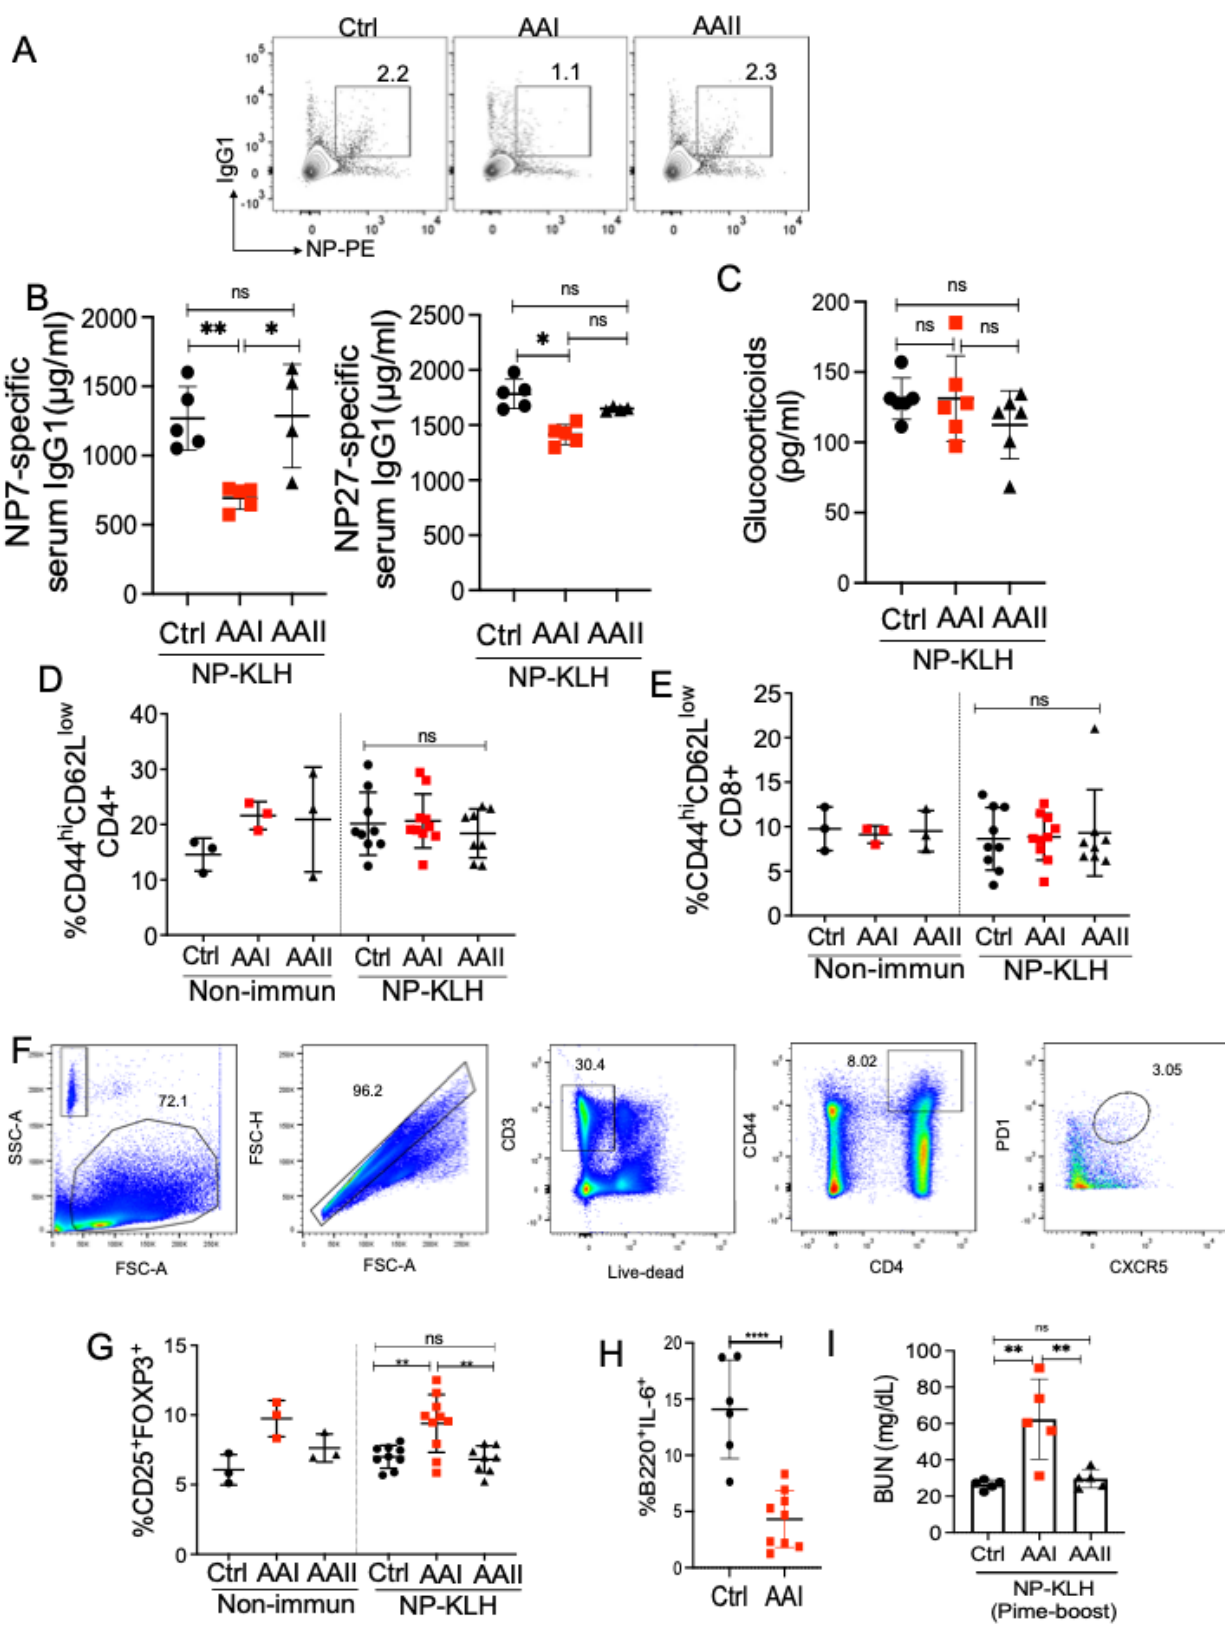

**Fig S2: T cell response in NP-KLH immunized mice with kidney disease.** WT mice were i.p. injected with a single dose of AAI, AAI (7.5 mg/kg b.wt) or PBS (Ctrl). Mice were either immunized with NP-KLH in alum or left non-immunized (non-immun) 4 days post-AAI injection. At 12 days post-immunization, spleens were assessed for (A) NP-specific switched IgG1<sup>+</sup> B cells (liveIgD<sup>-</sup>IgM<sup>-</sup>CD138<sup>-</sup>Gr1<sup>-</sup>B220<sup>+</sup>NP<sup>+</sup>IgG1<sup>+</sup>) by flow cytometry (representative flow plot). (B) Serum NP7 and NP27-specific IgG1 by ELISA at day 21 post-immunization [NP7-specific serum IgG1: Ctrl (5), AAI (5), AAI (4) and NP27-specific serum IgG1: Ctrl (5), AAI (5), AAI (4) and NP7/NP27: Ctrl (5), AAI (5), AAI (4)], (C) Serum glucocorticoids level by ELISA [Ctrl (6), AAI (6), AAI (6)], (D) activated CD4<sup>+</sup> T (live CD4<sup>+</sup>CD44<sup>hi</sup>CD62L<sup>lo</sup>) cells [Non-immun: Ctrl (3), AAI (3), AAI (3); NP-KLH Ctrl (9), AAI (10), AAI (8)], (E) activated CD8<sup>+</sup> T (live CD8<sup>+</sup>CD44<sup>hi</sup>CD62L<sup>lo</sup>) cells by flow cytometry at day 12 post-immunization [Non-immun: Ctrl (3), AAI (3), AAI (3); NP-KLH Ctrl (9), AAI (10), AAI (8)]. (F) Representative flow plot showing gating strategy for TFh cells in the spleen of immunized or non-immunized AAN and control mice, and (G) percentage of T regulatory (liveCD4<sup>+</sup>CD25<sup>+</sup>Foxp3<sup>+</sup>) cells in the spleen was assessed by flow cytometry [Non-immun: Ctrl (3), AAI (3), AAI (3), NP-KLH Ctrl (9), AAI (10), AAI (8)]. (H) Intracellular IL-6 staining of purified splenic B cells from NP-KLH immunized AAN and control mice following LPS stimulation at day 12 post-immunization [Ctrl (6), AAI (9)]. (I) AAN and control mice were primed with NP-KLH in alum followed by NP-KLH boost 36 days later. The boosted (n=5) mice were evaluated for serum BUN six days later [Ctrl (5), AAI (5), AAI (5)]. Each dot represents individual mice and data pooled from 2-3 experiments (B-E and G-I). Data expressed as Mean ± SD. Statistical analyses by One-way ANOVA (B-E, G and I) and two-sided t-test (H). (B) Ctrl vs. AAI \*\* P = 0.0088, AAI vs. AAI \* P = 0.0105 and Ctrl vs. AAI \* P=0.0402. (G) Ctrl vs. AAI \*\* P=0.0040, AAI vs. AAI \*\* P=0.0028. (H) Ctrl vs. AAI \*\*\*\*

P<0.0001. (I) Ctrl vs. AAI \*\* P=0.0026, AAI vs. AAI \*\* P= 0.0052. ns: statistically not significant. Source data are provided as a Source Data file.

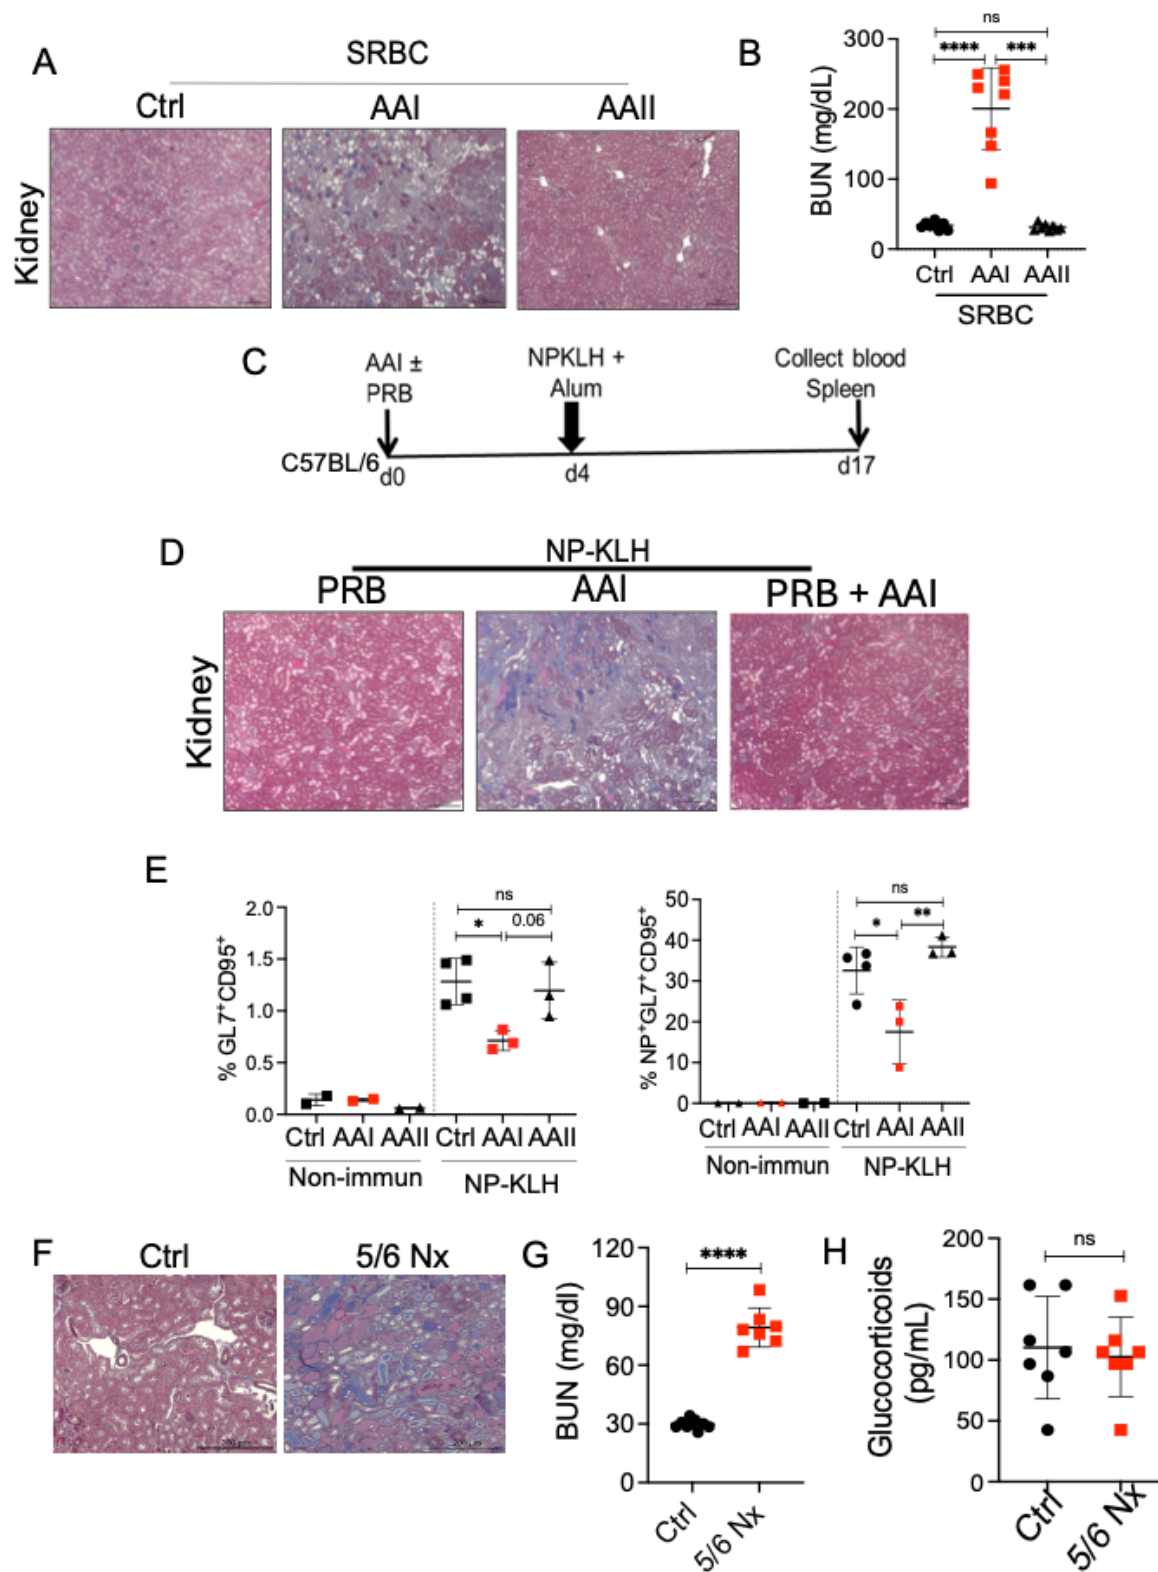

**Fig S3: B cell response following SRBC immunization and 5/6 nephrectomy.** AAN and control mice were i.p. immunized with 2.5% SRBC (n=8) 4 days post-AAI injection. (A) Renal fibrosis was evaluated following staining with Masson's trichrome stain of kidney sections at day 7 post-immunization (n=4). Image representative of 2 independent experiments. Scale bar = 50  $\mu$ m. (B) Serum BUN was assessed at day 7 post-immunization [Ctrl (8), AAI (8), AAI (8)]. (C) Schematic representation of the probenecid treatment experiment. AAN mice were either treated with probenecid (PRB+AAI) once on day 0 (relative to AAI injection) or left untreated (n=8-10). Control mice received probenecid only (PRB). Four days later, mice received NP-KLH immunization and (D) renal fibrosis was assessed following Masson's trichrome staining of kidney sections (Scale bar = 50  $\mu$ m) (n=4). (E) C57BL/6 (WT) mice were i.p. injected with a single dose of AAI, AAI (7.5 mg/kg b.wt) or PBS (Ctrl). Mice were either immunized with NP-KLH in alum or left non-immunized (non-immun) 10 days post-AAI injection. At 12 days post-immunization, spleens were assessed for total GC B cells (liveB220<sup>+</sup>GL7<sup>+</sup>CD95<sup>+</sup>) and NP-specific GC B cells (liveB220<sup>+</sup> NP<sup>+</sup>GL7<sup>+</sup>CD95<sup>+</sup>) by flow cytometry [Non-immun: Ctrl (2), AAI (2), AAI (2); NP-KLH: Ctrl (4), AAI (3), AAI (3) and Non-immun: Ctrl (2), AAI (2), AAI (2); NP-KLH: Ctrl (4), AAI (3), AAI (3)]. WT mice were either subjected to 5/6 nephrectomy (5/6 Nx) or sham-operated (Ctrl). (F) Renal fibrosis was evaluated following staining with Masson's trichrome stain of 5/6 nephrectomized or control kidney sections at two weeks post-surgery (n=4). Image representative of 2 independent experiments. Scale bar = 50  $\mu$ m. (G) Two weeks after surgery, 5/6 nephrectomized mice were evaluated for kidney function by measuring serum BUN by enzymatic analysis [Ctrl (9), 5/6 Nx (7)]. (H) Serum glucocorticoids level was measured in 5/6 nephrectomized mice at day 12 post-immunization [Ctrl (7), 5/6 Nx (7)]. Each dot represents individual mice and data pooled from 2 experiments (B, E, G, H). Data expressed as Mean  $\pm$  SD.



Statistical analysis by one-way ANOVA (B, E) and two-sided t-test (G, H). (B) Ctrl vs AAI \*\*\*\*  
P<0.0001, AAI vs. AAI \*\* P=0.0002. (E) Ctrl vs. AAI \* P=0.0240 and Ctrl vs. AAI \* P=0.0265,  
AAI vs. AAI \*\* P= 0.0075. (G) Ctrl vs. 5/6 Nx \*\*\*\* P<0.0001. ns: statistically not significant.  
Source data are provided as a Source Data file.

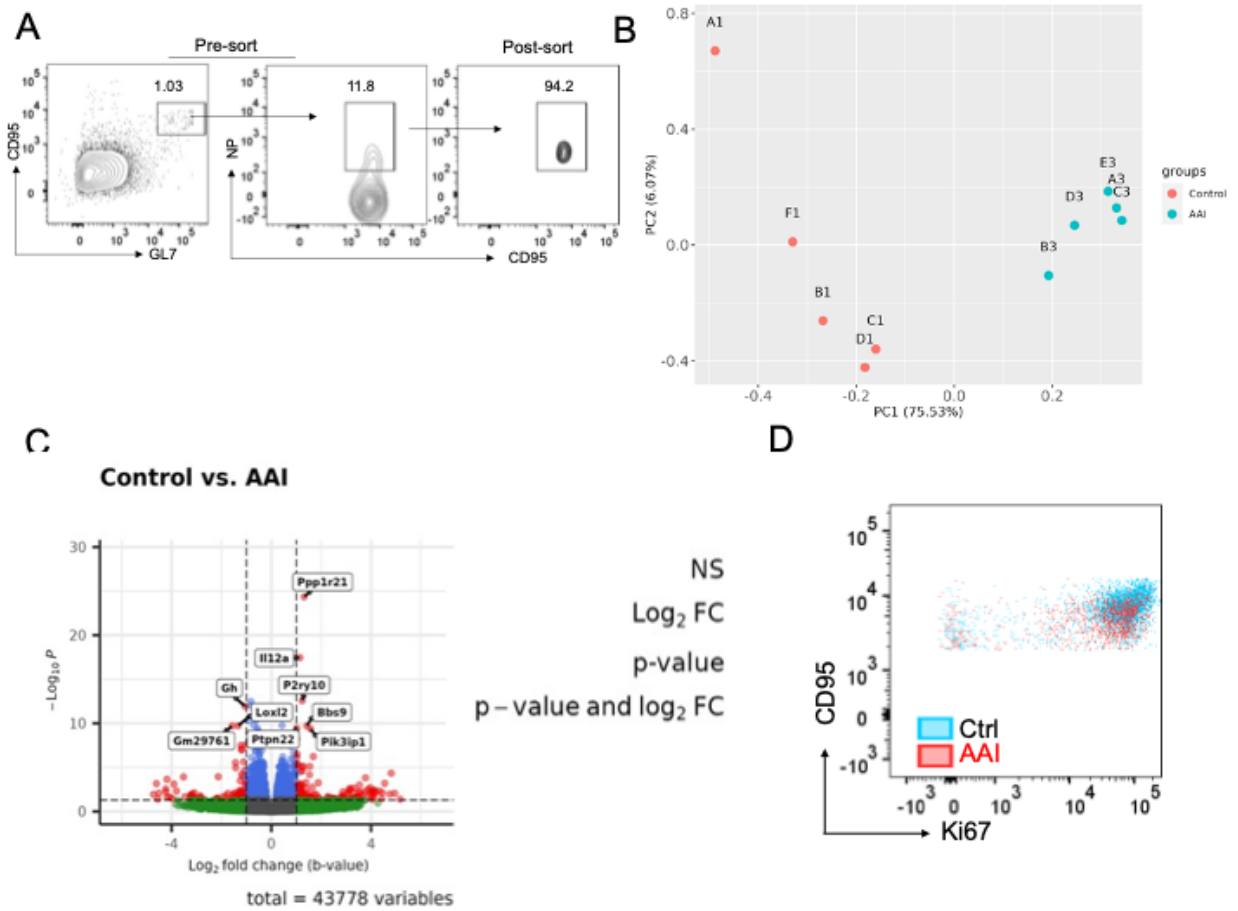

**Fig S4: Flow sorting of NP-specific GC B cells and RNA-Seq analysis.** (A) NP-specific GC (live NP<sup>+</sup>B220<sup>+</sup> GL7<sup>+</sup>CD95<sup>+</sup>) B cells from control and AAN mice (n=5) were flow sorted from spleen on day 12 post-immunization and subjected to RNA-seq analysis. Representative contour plot showing pre- and post-sorting gating strategy and post sort-purity. (B) Principal component analysis (PC1/PC2) of AAN and control NP-specific GC B cells. (C) The volcano plot showing differentially expressed genes between NP-specific GC B cells from mice with kidney disease and control after NP-KLH immunization. (D) Ki67<sup>+</sup> GC B cells (n=5-7) was analyzed at day 12 post-immunization by flow cytometry. Flow cytometry plot representative of two independent experiments. Source data are provided as a Source Data file.

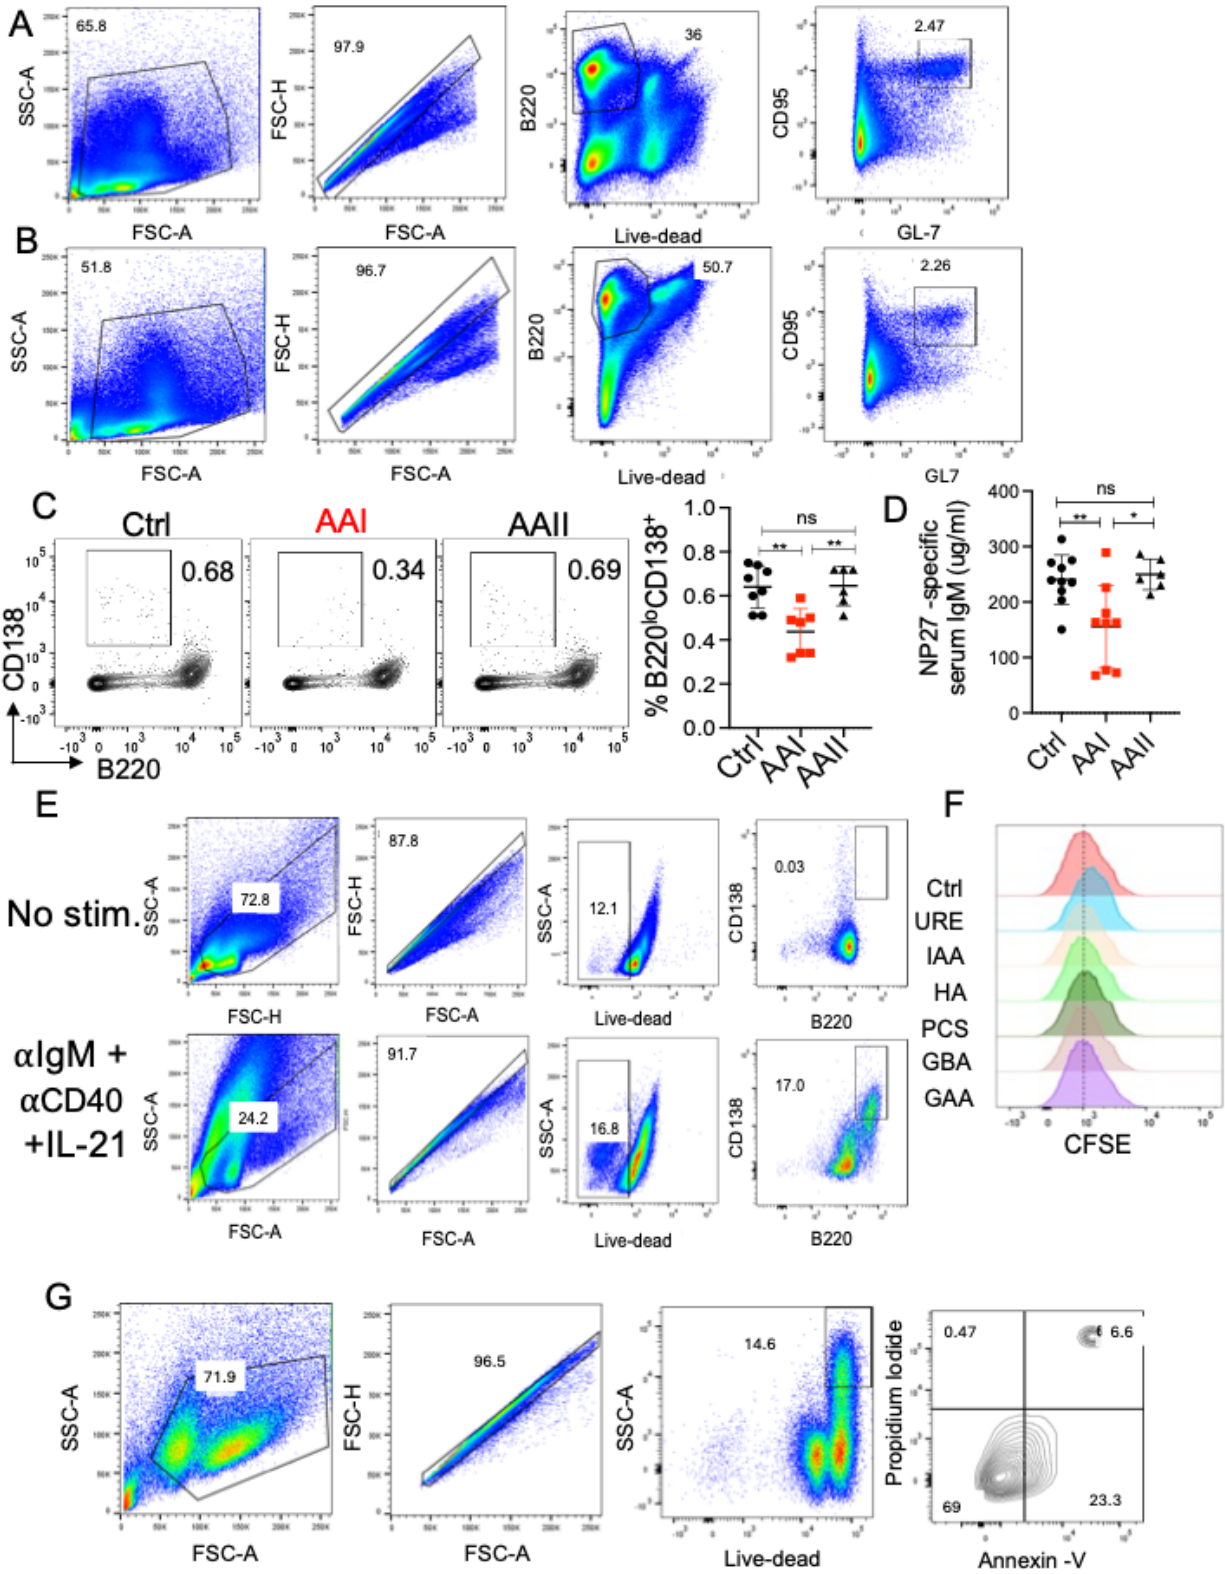

**Fig S5: Uremic toxins have negative impact on in vitro B cell differentiation.** WT mice were i.p. injected with a single dose of AAI, AAI (7.5 mg/kg b.wt) or PBS (control). Mice were either immunized with NP-KLH in alum or left non-immunized (non-immun) 4 days post-AAI injection. At 12 days post-immunization, spleens were assessed for the loss of mitochondrial membrane potential (TMRE staining) and mitoROS (MitoSox Red) production in GC B cells. Representative flow plots showing gating strategy employed for (A) TMRE and (B) MitoSox Red staining. AAI and control mice were immunized with NP-KLH in alum 4 days post-AAI injection. Four days later mice were evaluated for (C) plasmablasts (liveB220<sup>lo</sup>CD138<sup>+</sup>) by flow cytometry [Ctrl (8), AAI (7), AAI (6)] and (D) serum NP27-specific IgM antibody titer by ELISA [Ctrl (10), AAI (9), AAI (6)]. (E) WT resting splenic B cells  $\pm$  uremic toxins were stimulated with  $\alpha$ IgM/ $\alpha$ CD40/IL-21 and the number of B220<sup>+</sup>CD138<sup>+</sup> plasmablasts was determined by flow cytometry at 96 h. Representative flow plots showing gating strategy for determining the plasmablast frequency. (F) CFSE-labeled splenic B cells were stimulated with  $\alpha$ IgM/ $\alpha$ CD40/IL-21  $\pm$  uremic toxins (as indicated in the figure) and proliferation of B220<sup>+</sup>CD138<sup>+</sup> plasmablasts was assessed at 48 h post-stimulation. (G) Representative flow plots showing gating strategy for assessing the frequency of apoptotic cells within the plasmablast population. Each dot represents individual mice and data are pooled from at least 2-3 independent experiments (C and D). (C) Ctrl vs. AAI \*\* P= 0.0021, AAI vs. AAI \*\* P= 0.0032. (D) Ctrl vs. AAI \*\* P= 0.0074, AAI vs. AAI \* P= 0.016. Data expressed as Mean  $\pm$  SD. Statistical analyses by One-way ANOVA (C and D). ns: statistically not significant. Source data are provided as a Source Data file.

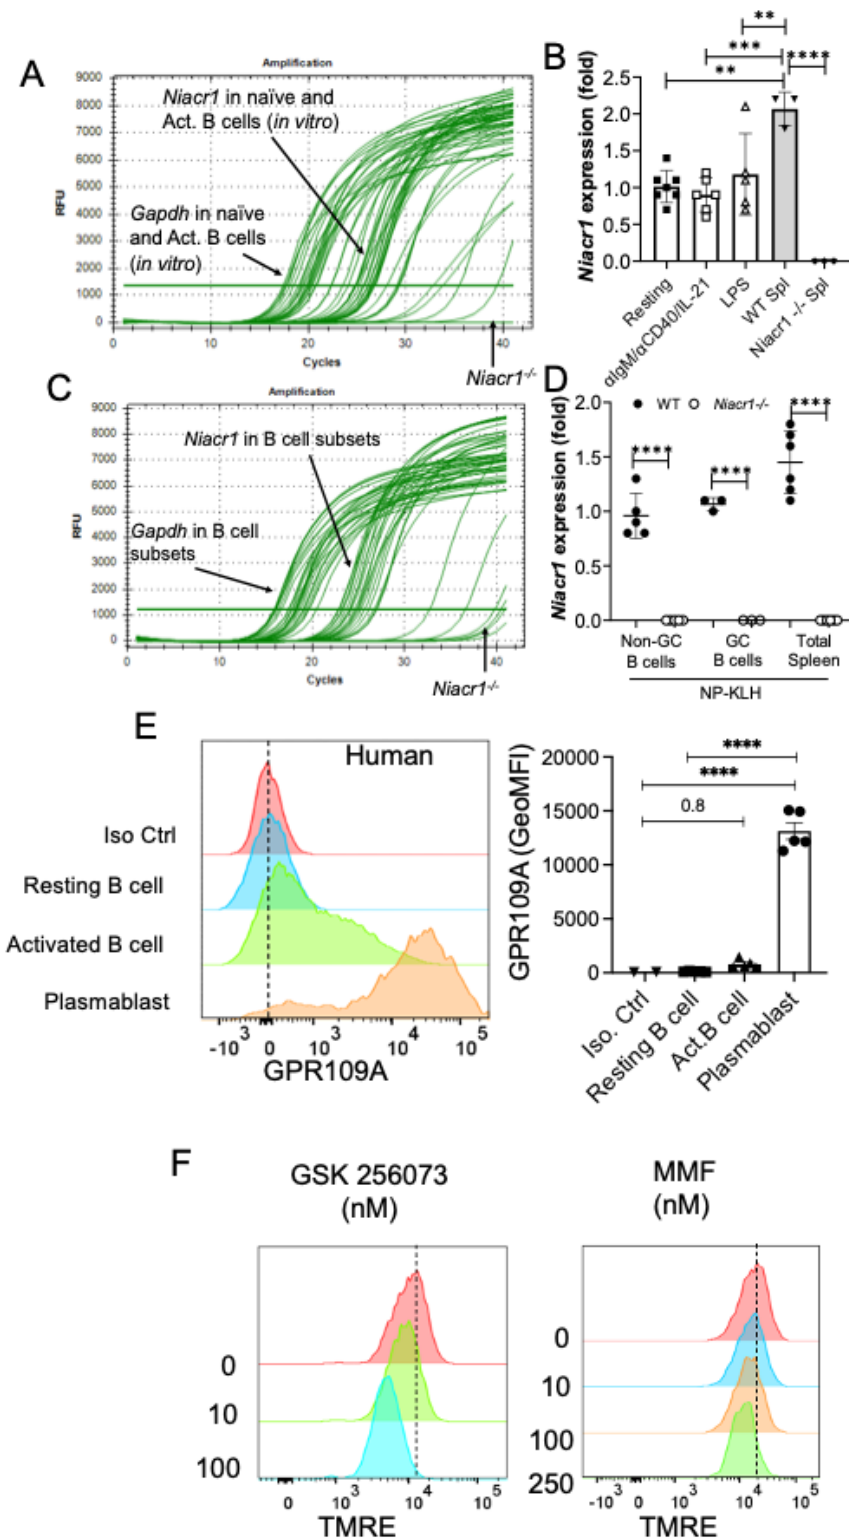

**Fig S6: *Niacr1* gene expression in mouse and human B cells.** Resting splenic B cells  $\pm$   $\alpha$ IgM/ $\alpha$ CD40/IL-21 or LPS were assessed for *Niacr1* mRNA expression by RT-qPCR at 24 h. Total splenocytes from WT and *Niacr1*<sup>-/-</sup> mice were used as positive and negative controls, respectively. **(A)** Representative real time qPCR amplification plot and **(B)** data expressed as fold change [Resting (7),  $\alpha$ IgM/ $\alpha$ CD40/IL-21 (6), LPS (5), WT spleen (3), *Niacr1*<sup>-/-</sup> spleen (3)]. *Niacr1* transcript expression was assessed by RT-qPCR on NP-KLH immunized and FACS-sorted non-GC (liveB220<sup>+</sup>GL7<sup>-</sup>CD95<sup>-</sup>), GC (liveB220<sup>+</sup>GL7<sup>+</sup>CD95<sup>+</sup>) (2 mice pooled together) and total spleen cells from WT and *Niacr1*<sup>-/-</sup> mice) at day 12 post-immunization. **(C)** Representative real time qPCR amplification plot and **(D)** data expressed as fold change [Non-GC B cells WT (5), *Niacr1*<sup>-/-</sup> (5), GC B cells WT (3), *Niacr1*<sup>-/-</sup> (3), Total spleen WT (6), *Niacr1*<sup>-/-</sup> (6)]. **(E)** Healthy donor B cells (n=5)  $\pm$   $\alpha$ IgM/sCD40L/IL-21 and GPR109A expression was evaluated at 24 h by flow cytometry [Iso Ctrl (2), Resting B cell (5), Act.B cell (5), Plasmablast (5)]. Splenic B cells were stimulated with  $\alpha$ IgM/ $\alpha$ CD40/IL-21  $\pm$  **(F)** GSK256073 or  $\pm$  MMF (GPR109A agonists) at indicated concentrations and the loss of mitochondrial membrane potential was evaluated (TMRE staining) at 24 h by flow cytometry. Each dot represents individual mice (B and D), or donor (E) and data are pooled from at least 2-3 independent experiments (B, D). (B) Resting vs WT spleen \*\* P= 0.008,  $\alpha$ IgM/ $\alpha$ CD40/IL-21 vs. WT spleen \*\*\* P= 0.0004, LPS vs. WT spleen \*\* P= 0.0042, WT vs. *Niacr1*<sup>-/-</sup> spleen \*\*\*\* P <0.0001. (D) \*\*\*\* P <0.0001. (E) Iso Ctrl vs. Act. B cell \*\* P=0.0049, Iso Ctrl vs. Plasmablast \*\*\*\* P<0.0001, Resting B cell vs. Plasmablast \*\*\*\* P<0.0001. Data expressed as Mean  $\pm$  SD. Statistical analyses by One-way ANOVA (B, D and E). Source data are provided as a Source Data file.

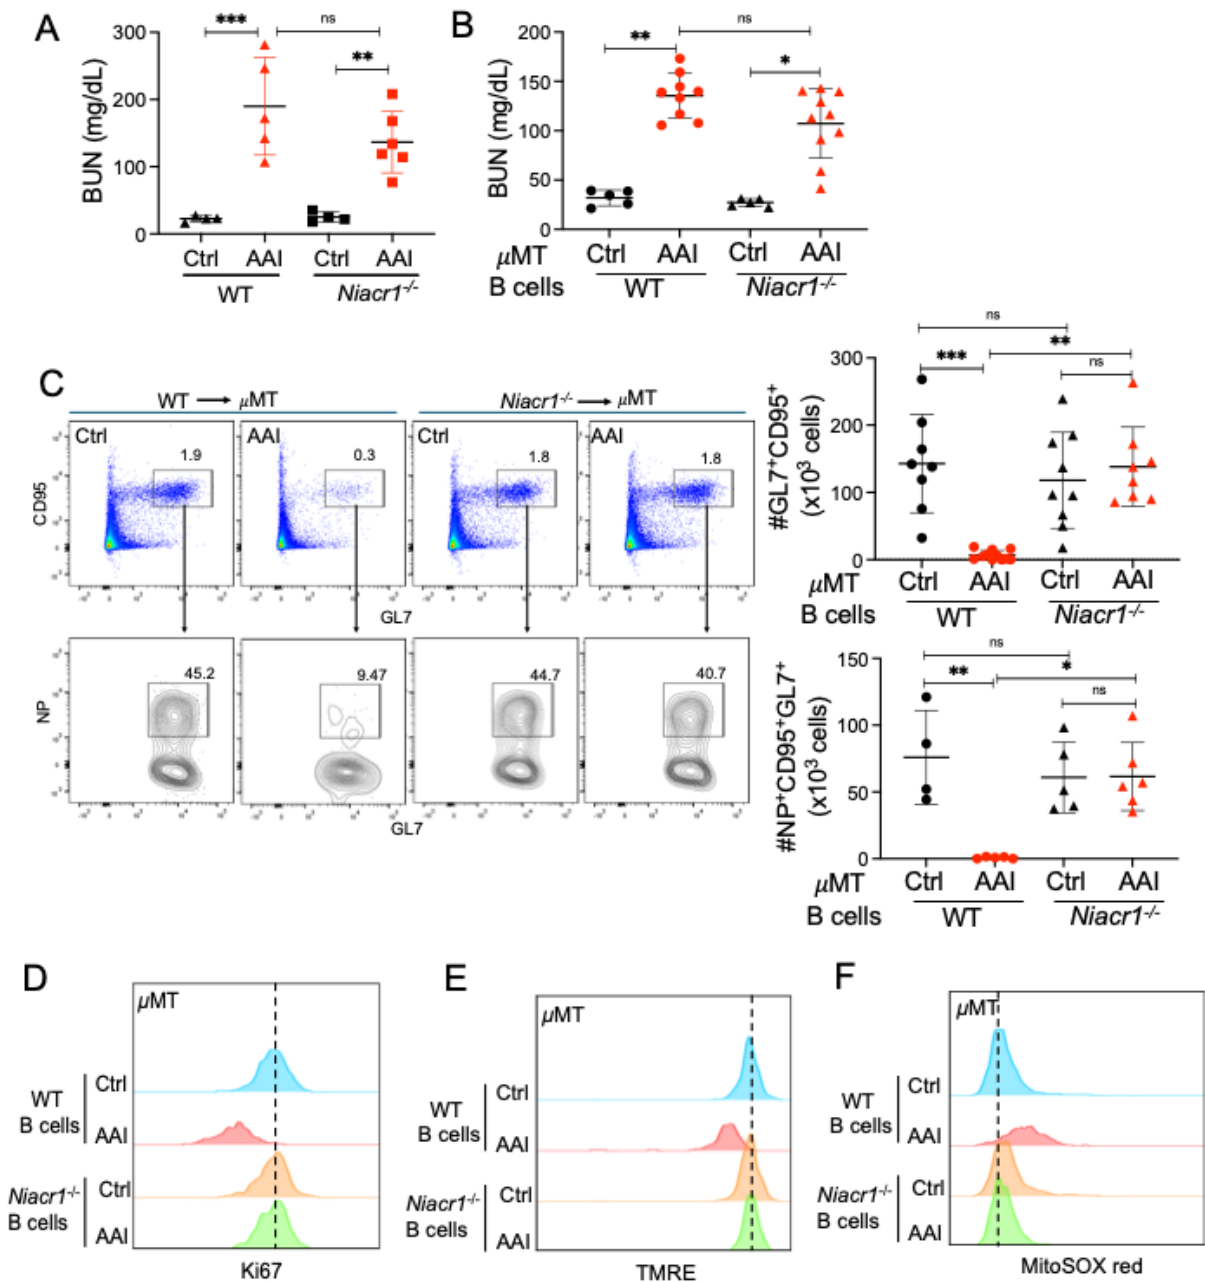

**Fig S7: HA-GPR109A-axis in B cells regulates apoptosis in kidney disease.** (A) WT and *Niacr1*<sup>-/-</sup> mice were subjected to AAN followed by NP-KLH immunization. Serum BUN was measured in WT and *Niacr1*<sup>-/-</sup> mice at day 12 post-immunization by enzymatic assay [WT Ctrl (4), AAI (5), *Niacr1*<sup>-/-</sup> Ctrl (4), AAI (6)]. Control and AAI-injected μMT mice receiving either WT or *Niacr1*<sup>-/-</sup>

resting splenic B cells were evaluated for (B) serum BUN [WT Ctrl (5), AAI (9), *Niacr1*<sup>-/-</sup> Ctrl (5), AAI (10)] and (C) absolute number of total and NP-specific GC B cells [WT Ctrl (8), AAI (11), *Niacr1*<sup>-/-</sup> Ctrl (9), AAI (8) and WT Ctrl (4), AAI (5), *Niacr1*<sup>-/-</sup> Ctrl (5), AAI (7)], (D) proliferation, (E) loss of mitochondrial membrane potential, and (F) mitochondrial ROS generation by total GC B cells at day 12 post-immunization (representative histogram). Each dot represents individual mice and data are pooled from at least 2-3 independent experiments (A-F). Data expressed as Mean  $\pm$  SD (A-C). Statistical analyses by One-way ANOVA (A-C). (A) WT Ctrl vs. AAI \*\*\* P=0.0004, *Niacr1*<sup>-/-</sup> Ctrl vs. AAI \*\* P=0.0091. (B) WT Ctrl vs. AAI \*\* P=0.0050, *Niacr1*<sup>-/-</sup> Ctrl vs. AAI \* P=0.0252. (C) WT Ctrl vs. AAI \*\*\* P=0.0003, *Niacr1*<sup>-/-</sup> Ctrl vs. AAI \*\* P=0.0025 and WT Ctrl vs. AAI \*\* P=0.0031, *Niacr1*<sup>-/-</sup> Ctrl vs. AAI \* P=0.033. ns: statistically not significant. Source data are provided as a Source Data file.



**Supplementary Table:**

**Table S1: Demographic information of healthy participants (n=8)**

| <i>Total number of healthy human participants</i> | <i>Race</i>                                               | <i>Gender</i>       | <i>Age</i>  |
|---------------------------------------------------|-----------------------------------------------------------|---------------------|-------------|
| 8                                                 | 3 Caucasians, 3 Asians, 1 African American and 1 Hispanic | 3 Female and 5 Male | 40.25 ± 8.3 |
